# Supplementary material for: NMR-Based Μetabolomics of the Lipid Fraction of Organic and Conventional Bovine Milk
Source: MDPI journal article supplement (doi:10.3390/molecules24061067), 2019-03-18
Supplement: s1 [file s1]

# NMR-Based Metabolomics of the Lipid Fraction of Organic and Conventional Bovine Milk

Constantinos G. Tsiafoulis<sup>\*1,2</sup>, Christina Papaemmanouil<sup>3</sup>, Dimitrios Alivertis<sup>4</sup>, Ouranios Tzamaloukas<sup>5</sup>, Despoina Miltiadou<sup>5</sup>, Stéphane Balayssac<sup>6</sup>, Myriam Malet-Martino<sup>6</sup>, Ioannis P. Gerotherassis<sup>\*3</sup>

<sup>1</sup>NMR Center, University of Ioannina, Ioannina GR-45110, Greece

<sup>2</sup>Laboratory of Analytical Chemistry, Department of Chemistry; University of Ioannina, Ioannina GR-45110, Greece

<sup>3</sup>Section of Organic Chemistry and Biochemistry, Department of Chemistry; University of Ioannina, Ioannina GR-45110, Greece

<sup>4</sup>Department of Biological Applications and Technology; University of Ioannina, Ioannina GR-451 10, Greece

<sup>5</sup>Department of Agricultural Sciences, Biotechnology and Food Sciences, Cyprus University of Technology, P. O. Box 50329, Limassol 3603, Cyprus

<sup>6</sup>Biomedical NMR Group, SPCMIB Laboratory, Université Paul Sabatier, 118 route de Narbonne, 31062 Toulouse cedex, France

\*Correspondence: [ctsiafou@uoi.gr](mailto:ctsiafou@uoi.gr) (C.G.T.); [igeroth@uoi.gr](mailto:igeroth@uoi.gr) (I.P.G)

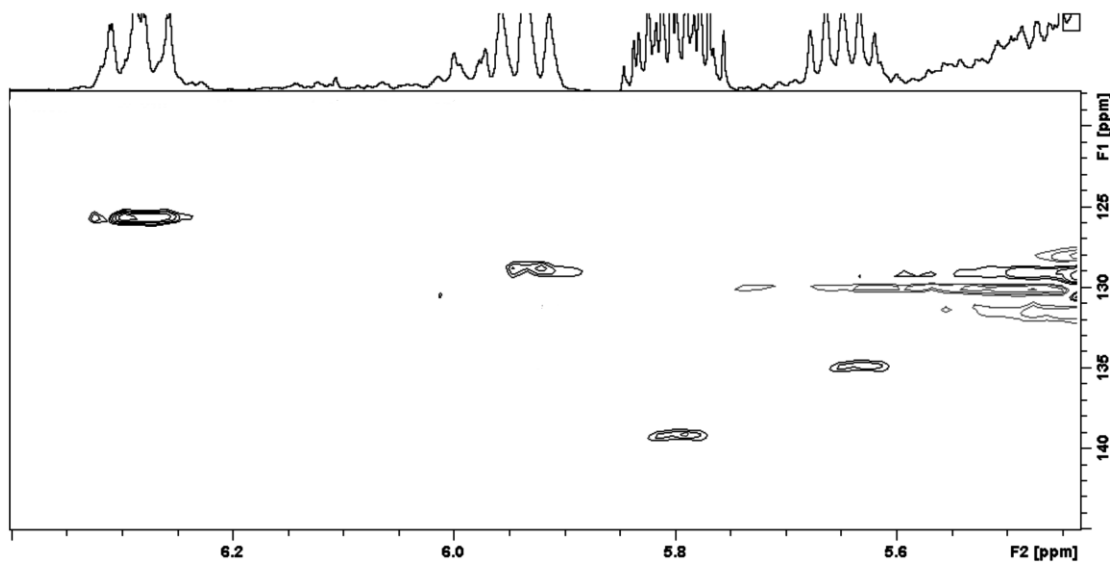

**Figure S1.** Selected region of 500 MHz  $^1\text{H}$ - $^{13}\text{C}$  HSQC spectrum of the lipid fraction of a lyophilized bovine milk sample in  $\text{CDCl}_3$  illustrating  $^1\text{H}$ - $^{13}\text{C}$  connectivities of conjugated (9-*cis*,11-*trans*)18:2 linoleic acid (CLA) and caproic acid; T, 298 K; 40 repetitions of 256 increments, total experimental time 4 h 35 min.

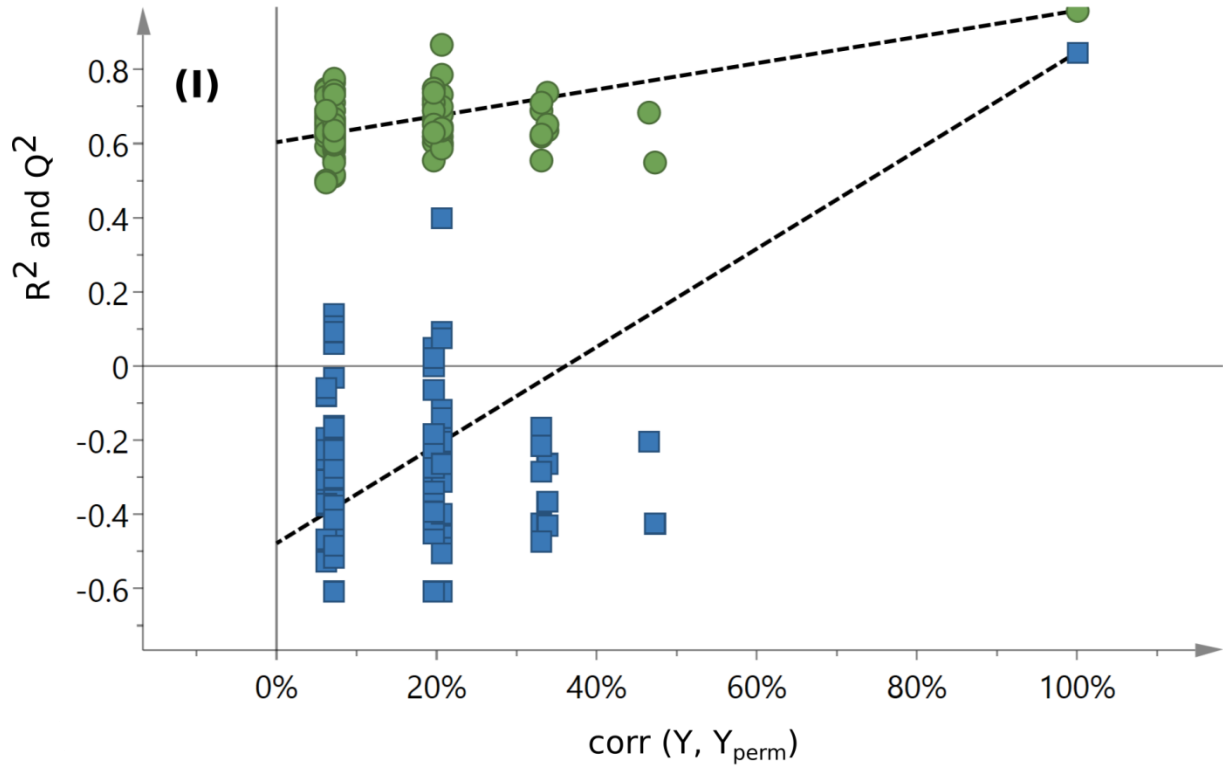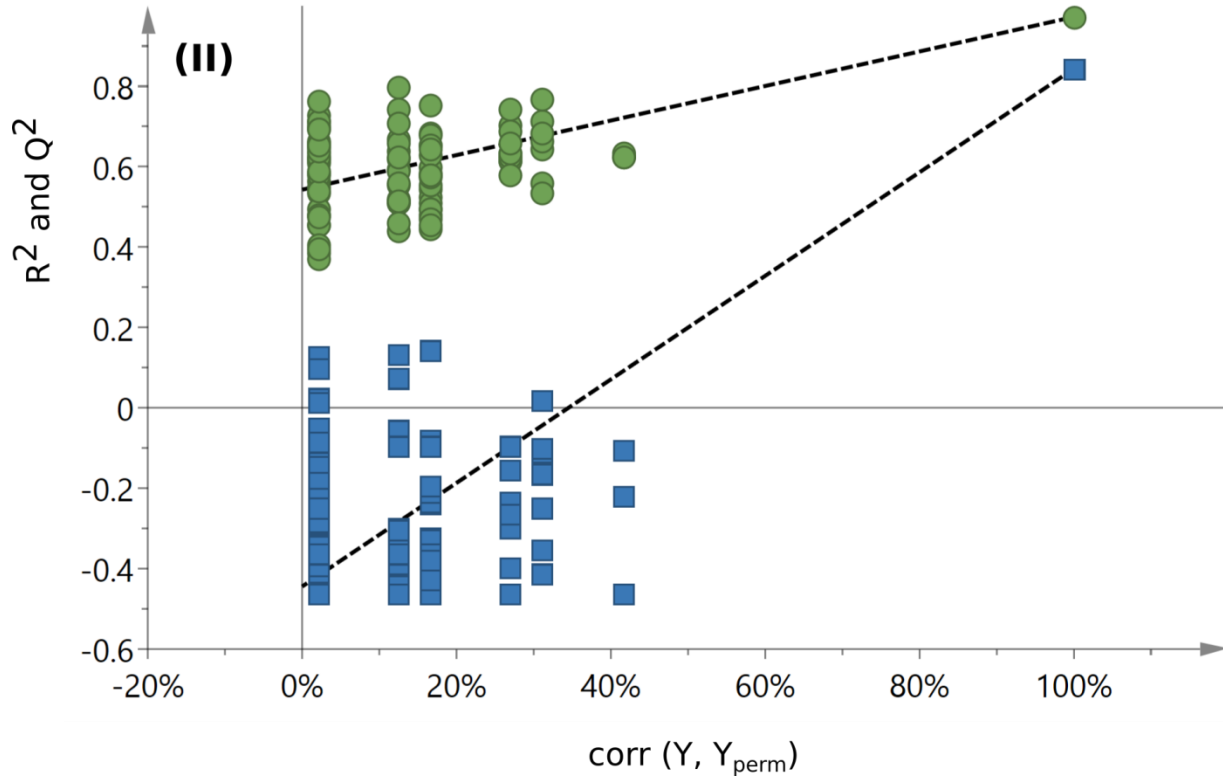

Figure S2. Permutation test of the P samples with PLS-DA: (I) UNor method, (II) NorCont method.

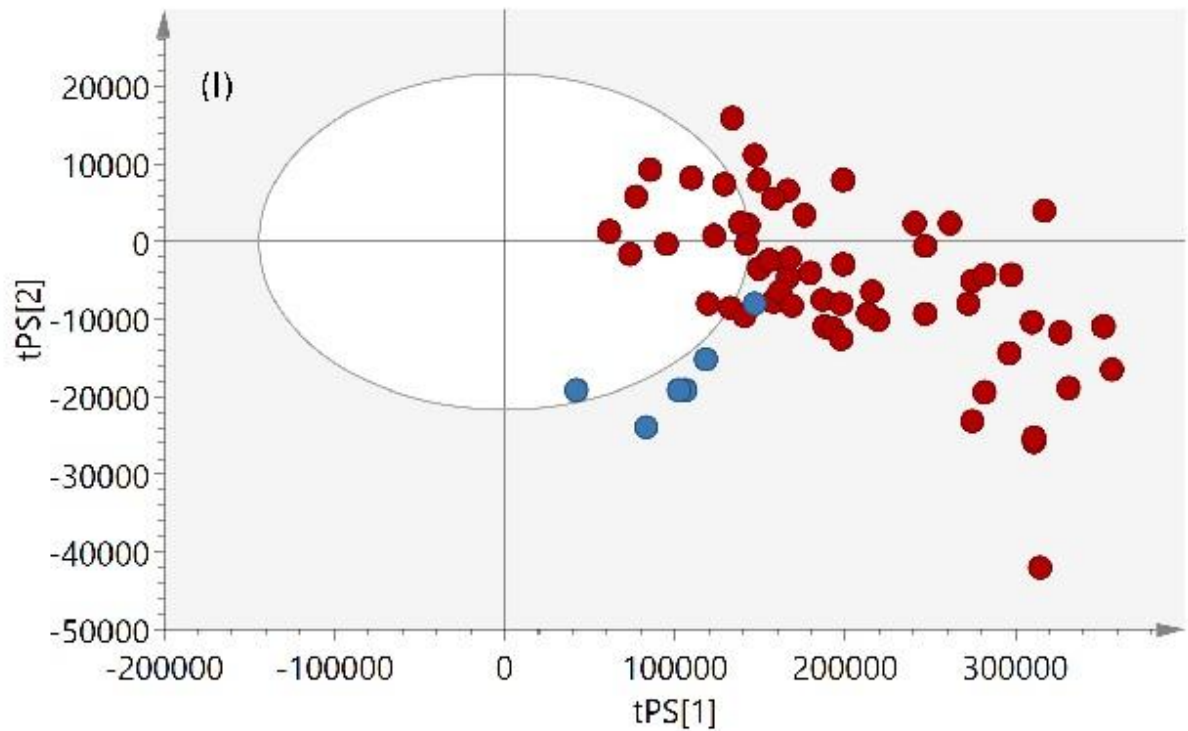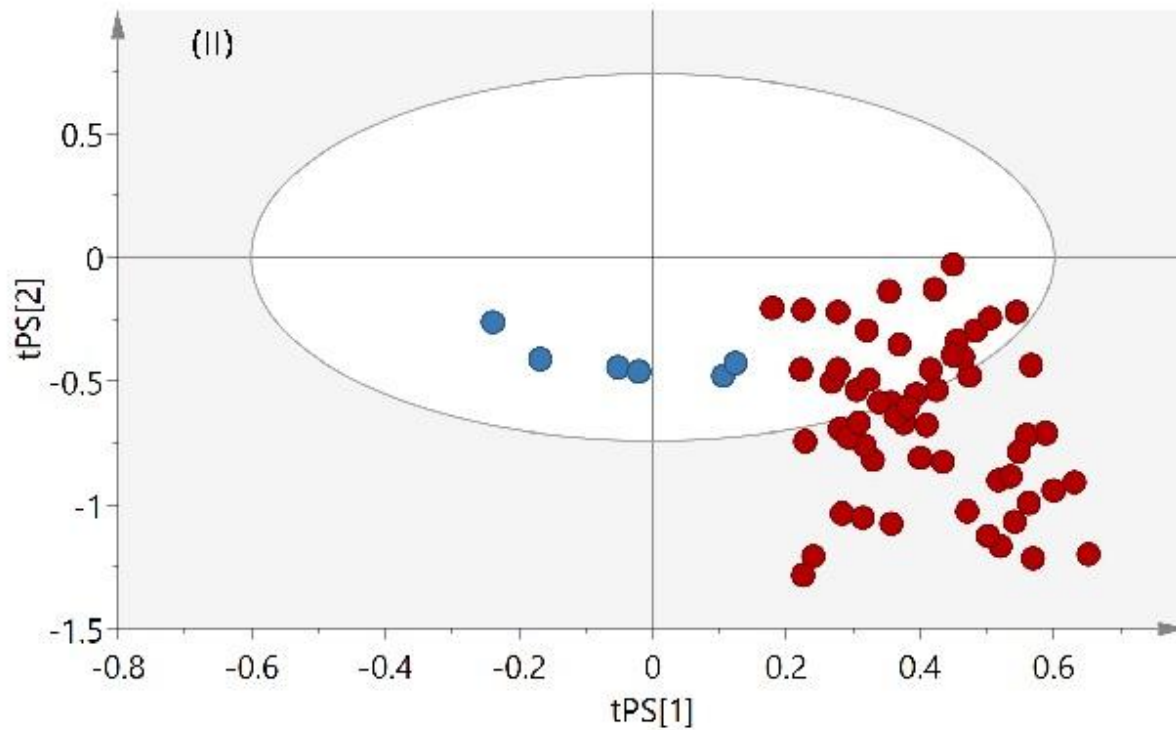

**Figure S3.** Predicted Score Plot of the R samples (as test set) using P samples as a prediction set: (I) UNor method, (II) NorCont method (blue circles: organic milk samples, red circles: conventional milk samples).

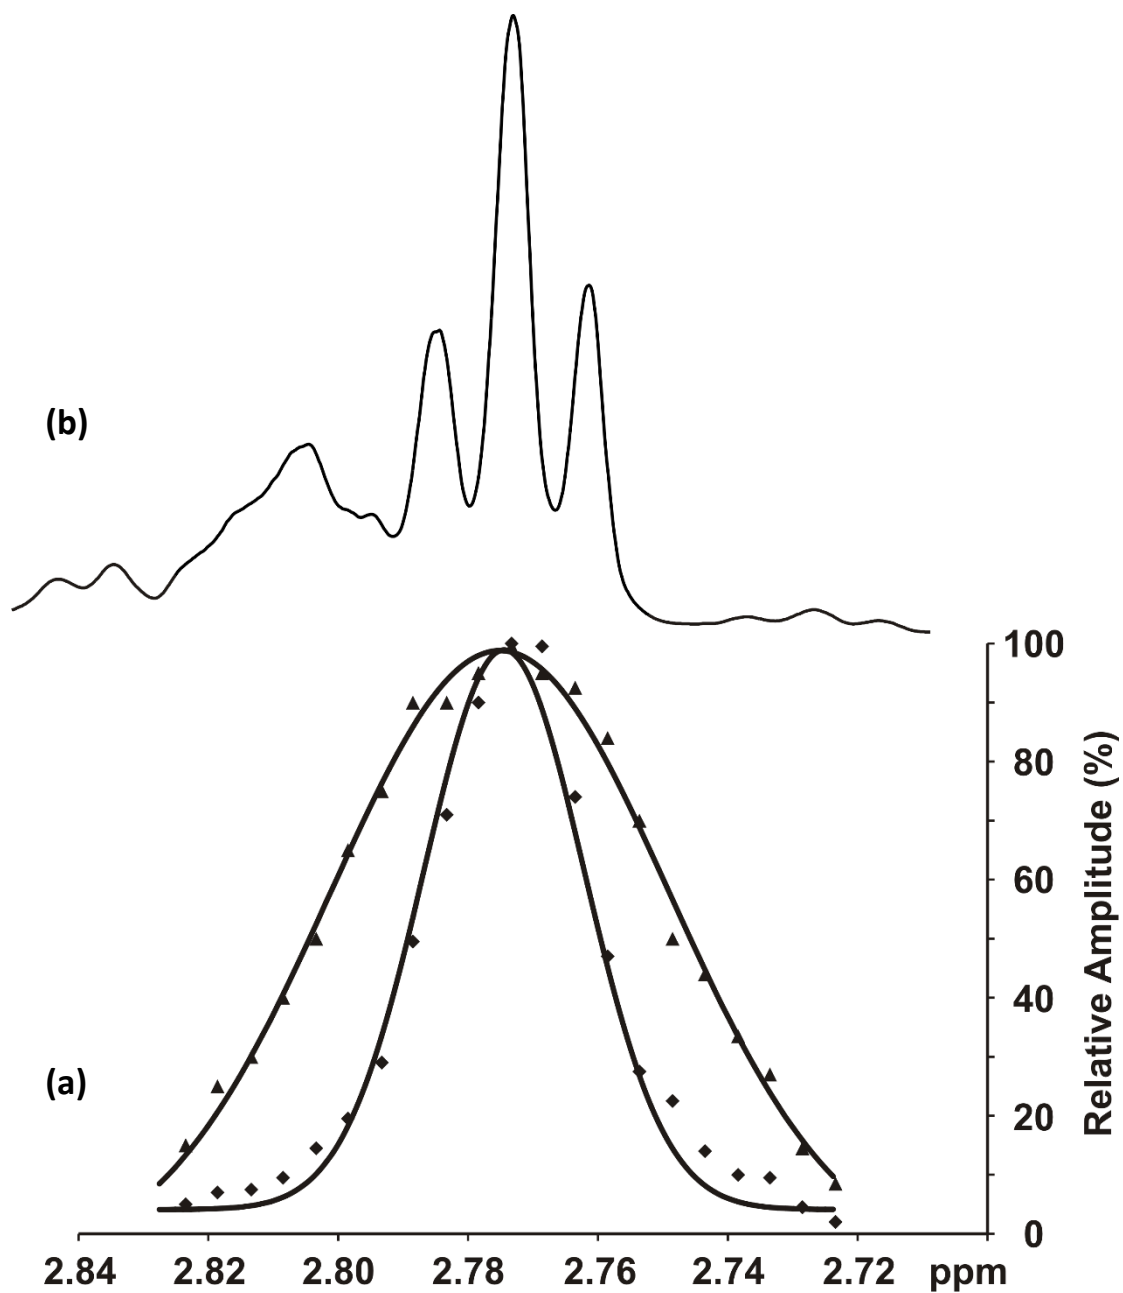

**Figure S4.** (a) Selectivity of the excitation bandwidth of the shaped pulse of 20 ms (▲) and 80 ms (◆) of the 1D TOCSY experiment. The carrier frequency of the shaped pulse was set in both cases at  $\delta = 2.77$  ppm. (b) For comparison the apparent triplets of the allylic protons of linoleic acid ( $\delta = 2.77$  ppm) and  $\alpha$ -linolenic acid ( $\delta = 2.81$  ppm) of the 1D <sup>1</sup>H NMR spectrum of the lipid fraction of lyophilized bovine milk sample in CDCl<sub>3</sub> are presented.

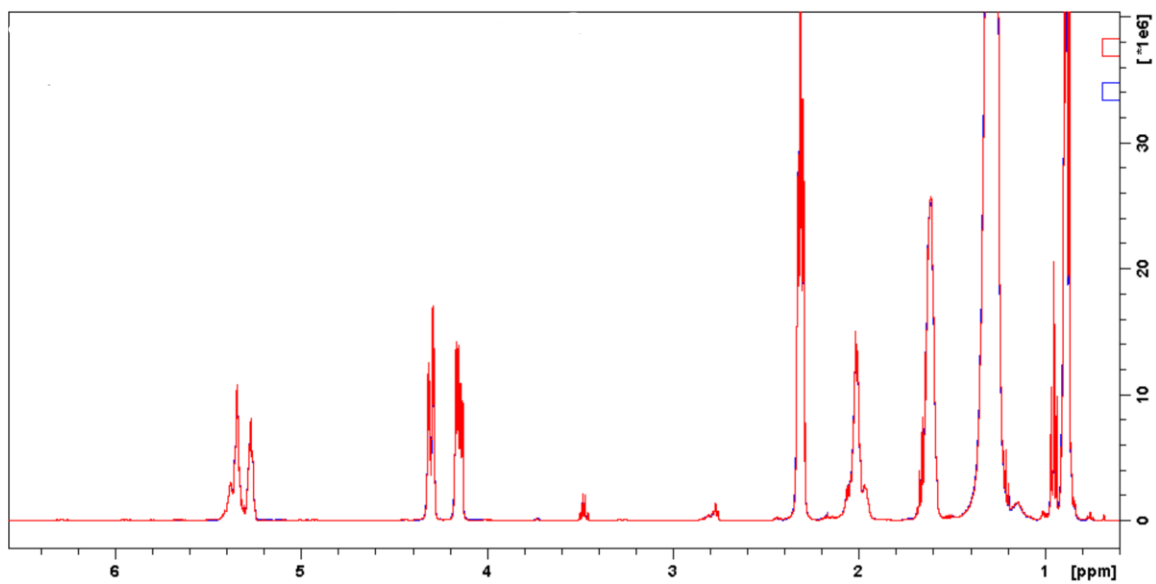

**Figure S5.** 500 MHz  $^1\text{H}$  NMR spectra of the lipid fraction of a lyophilized bovine milk sample in  $\text{CDCl}_3$ ; T, 298 K; number of scans, 256 ; recycle time, 9.3 s (blue color) and 14.5 s (red color).
